# Supplementary material for: Deletion of inositol hexakisphosphate kinase 1 (IP6K1) reduces cell migration and invasion, conferring protection from aerodigestive tract carcinoma in mice
Source: PubMed Central journal article supplement (PMC4913618; doi:10.1016/j.cellsig.2016.04.011), 2016-08
Supplement: mmc1.pdf [file mmc1.pdf]

## Supplementary Table S1

List of primers used for RT-qPCR

| Gene           | RT-qPCR primers                                                         |
|----------------|-------------------------------------------------------------------------|
| <i>lfi202b</i> | F: 5'-AAAGTATACAGGAAAAGTACCGGA- 3'<br>R: 5'-TCTCAGAAACCACTCATCTGCAT- 3' |
| <i>Zfp560</i>  | F: 5'-AGAGTTCACCAAGACTGGGC- 3'<br>R: 5'-ACTGCATGGAGGCTCTTTGA- 3'        |
| <i>Pdgfb</i>   | F: 5'-CAAGACGCCTCAAGCTCGG- 3'<br>R: 5'-AAATAACCCTGCCACACTCTT- 3'        |
| <i>lqgap2</i>  | F: 5'-GGCAGCAAAGCTACATGACA- 3'<br>R: 5'-CCACCCCTTCATACTGCATC- 3'        |
| <i>Coro2a</i>  | F: 5'-CCAGTGCTTCCCATCAAA -3'<br>R: 5'-CCCAACAGAACAAGAAACAACA -3'        |
| <i>Tm6sf1</i>  | F: 5'-AGAGGCTTGATTGCTTTGGA- 3'<br>R: 5'-GAGCATCCAGGGACCACTAA-3'         |
| <i>Slc15a2</i> | F: 5'-TATCACCAACCGGGTCTTC- 3'<br>R: 5'-CATGCTAGATGGTGCCTGAGA- 3'        |
| <i>Arg1</i>    | F: 5'-ACAAGACAGGGCTCCTTTCAG- 3'<br>R: 5'-GGCTTATGGTTACCCTCCCG- 3'       |
| <i>Dmbt1</i>   | F: 5'-TCCACAGTCAGCACAAGTCC- 3'<br>R: 5'-CAGCTGTCATCACACACGGT- 3'        |
| <i>Paip1</i>   | F: 5'-CATCTGATGGTGTTCTTCTCACT-3'<br>R: 5'-CGATATCATCCAAATATGGGTCAC-3'   |
| <i>Edn1</i>    | F: 5'-TGCTGGAATTTCTGCCAAGC- 3'<br>R: 5'-TGGCCTCCAACCTTCGTAGT- 3'        |
| <i>Hoxc13</i>  | F: 5'-TCCCTTCCCAGACGTGGTTC-3'<br>R: 5'-CGGCGCTTCTCTTTGGTGAT-3'          |
| <i>Nup210</i>  | F: 5'-CCTGTCACACTTCTGGACTC- 3'<br>R: 5'-GAGGCAAGATAGTGGGGGCT- 3'        |
| <i>Sdcbp2</i>  | F: 5'-TGGGCTAAAGGACAAAAAGG-3'<br>R: 5'-AGGTGTCTGGAATGGAGTGG-3'          |
| <i>Ddx27</i>   | F: 5'-GGATCCTTCCCCAGGATGTTA- 3'<br>R: 5'-GTCGCTGTGCTGTGTCAATC- 3'       |
| <i>Dscam</i>   | F: 5'-CGGCCAGGCGACCTCATAC- 3'<br>R: 5'-GGTCCGACTTTTCTGGGGTT- 3'         |
| <i>Stx3</i>    | F: 5'-TGCTGGTGGAAAATCAGGGAG- 3'<br>R: 5'-AAGCCAAGATGATGGCAAGGA- 3'      |
| <i>Prkg2</i>   | F: 5'-TATGAGCTCCTAACGGGCAAC- 3'<br>R: 5'-CTTCTGTTGGGTTTTGCCTGC- 3'      |
| <i>Taf9</i>    | F: 5'-GGCCTTTGTCAATCTGGTACAC- 3'<br>R: 5'-TCTTGGGAGACGCCATCTTG- 3'      |
| <i>Fgd3</i>    | F: 5'-TGATGCTCTACTGTGTACCCAAA-3'<br>R: 5'-GCTCCAGGGACCTTTTCTT-3'        |
| <i>Ctsw</i>    | F: 5'-TCCATTCCAGGGGGACAGAA- 3'<br>R: 5'-TCTGGTAATGCTGGAGTAGTTTCA- 3'    |
| <i>Cpn1</i>    | F: 5'-CCGGGAAGCCTTAATCCAGTT- 3'<br>R: 5'-AATAATCCCCATGTTACCTGAAGT- 3'   |

|                 |                                                                     |
|-----------------|---------------------------------------------------------------------|
| <i>Ifna12</i>   | F: 5'-TGCTGGCAAGACTGAGTGAG-3'<br>R: 5'-ACTGTTGAAACATCAAGGCAACT-3'   |
| <i>Rbp1</i>     | F: 5'-GCCTTACGCAAATCGCCAA-3'<br>R: 5'-CAGTGGTCATGCACTTGCG-3'        |
| <i>Pon1</i>     | F: 5'-GGTCCTCAACTTTGACACCCT-3'<br>R: 5'-ATTCGAAGCACCTCTGAGCC-3'     |
| <i>Cxcl5</i>    | F: 5'-TCAGAAAATATTGGGCAGTGACAA-3'<br>R: 5'-GAAAATCCGTGGGTGGAGAGA-3' |
| <i>Smoc1</i>    | F: 5'-CGATGACATTAACAAGCGGGAG-3'<br>R: 5'-CTACCACCTTCTTTGCTAACACC-3' |
| <i>Mgp</i>      | F: 5'-GTGCTACGAATCTCACGAAAGC-3'<br>R: 5'-TGTTGATCTCGTAGGCAGGC-3'    |
| <i>Selenbp1</i> | F: 5'-ATGCCTGGTTTGATCACCGA-3'<br>R: 5'-CTCTAACAAATGCTGCCCCCA-3'     |
| <i>Meox1</i>    | F: 5'-AAAGAGAGGTCAGACAACCAGGA-3'<br>R: 5'-GAGCCGGTCAGGTAGTTGT-3'    |
| <i>Slfn2</i>    | F: 5'-GGCTGCAGTTAGAACTCTTCCA-3'<br>R: 5'-GTCATTCTCTGAGTTCTGTGGT-3'  |
| <i>Palmd</i>    | F: 5'-AACTGCAAATCTCAGCCAACG-3'<br>R: 5'-TGTCCTCGATTGACTCTTCTGG-3'   |
| <i>Rarres2</i>  | F: 5'-AATTCTGAAGCAAGGGCCTC-3'<br>R: 5'-GGGAGTAAGGTGAAGTCTGTGC-3'    |
| <i>Ptprz1</i>   | F: 5'-TCTACACCACCAACCCCATC-3'<br>R: 5'-AGCTCTGCACTTCTGGTAA-3'       |
| <i>Podn</i>     | F: 5'-GGACATCGCTGGGAATCAGC-3'<br>R: 5'-AGCCAGCTTGTTGAACCTGAG-3'     |
| <i>Arsk</i>     | F: 5'-ATCTACCCTACTATGCTTGACATTG-3'<br>R: 5'-TGCATCCATGGAATCACTC-3'  |
| <i>Aldh3b1</i>  | F: 5'-CCCCACAGTGTTAGTGGAC-3'<br>R: 5'-TGATAACCTGGCTTCTCTTGA-3'      |
| <i>Ccl17</i>    | F: 5'-ATGCCATCGTGTCTGACT-3'<br>R: 5'-GGTCACAGGCCGTTTTATGT-3'        |
| <i>Pcdhga1</i>  | F: 5'-CACTCACTGCTGACTCTCGAA-3'<br>R: 5'-GCGGGGCTTGCTGAGAAAATA-3'    |
| <i>Espn</i>     | F: 5'-GGCCATATACCCAGCACCAA-3'<br>R: 5'-ACTGCCTGAGAACACGGTTG-3'      |
| <i>Cxcl15</i>   | F: 5'-CTGCTGGCTGTCCTTAACCT-3'<br>R: 5'-GGGACTGCTATCACTTCTTTCT-3'    |
| <i>Fgf21</i>    | F: 5'-CTGGGGGTCTACCAAGCATA-3'<br>R: 5'-CACCCAGGATTTGAATGACC-3'      |
| <i>Mmp9</i>     | F: 5'-CAAGGACGGTTGGTACTGGAA-3'<br>R: 5'-AAAACCCTCTTGGTCTGCGG-3'     |
| <i>Mmp19</i>    | F: 5'-GATCCAGGCTCTCTATGGCAAG-3'<br>R: 5'-AGTCGCCCTTGAAAGCATAAGT-3'  |
| <i>Itga8</i>    | F: 5'-ACACGTTCTCAAGAGAAAGAATG-3'<br>R: 5'-ACATTCGGAGTGGCCCAAAT-3'   |
| <i>Mylk</i>     | F: 5'-GGCAGGAAATCTTCAACAGGG-3'<br>R: 5'-TCCACGACTTCCAGATCACG-3'     |
| <i>Igfbp3</i>   | F: 5'-AAGAAGAAGCAGTGCCGCC-3'<br>R: 5'-ATGTGGCACGGAGCATCTAC-3'       |

|               |                                                                              |
|---------------|------------------------------------------------------------------------------|
| <i>Triobp</i> | F: 5'-CAATTCCTGGTGGCGTGT-3'<br>R: 5'-GTTGACTCACCTGGCTCTC-3'                  |
| <i>Gapdh</i>  | F: 5'- GGAGAAGGCCGGGGCCCACTTGAA-3'<br>R: 5'- GCATGGACTGTGGTCATGAGCCCTCCAC-3' |
